# Supplementary material for: Biomass carbon derived from pine nut shells decorated with NiO nanoflakes for enhanced microwave absorption properties
Source: Royal Society of Chemistry journal article supplement (doi:10.1039/c9ra00466a), 2019-01-01
Supplement: c9ra00466a1.pdf [file c9ra00466a1.pdf]

## Supplementary materials

### **Biomass carbon derived from pine nut shells decorated with NiO nanoflakes for enhanced microwave absorption properties**

Huiya Wang<sup>a</sup>, Yanlin Zhang<sup>a</sup>, Qiuyue Wang<sup>a</sup>, Chaowei Jia<sup>a</sup>, Pan Cai<sup>a</sup>, Gang Chen<sup>a,b</sup>,  
Chengjun Dong<sup>\*a,b</sup>, Hongtao Guan<sup>\*a,b</sup>

*<sup>a</sup> School of Materials Science and Engineering, Yunnan University, Kunming 650091, P. R. China.*

*<sup>b</sup> Yunnan Province Key Lab of Micro-Nano Materials and Technology, Yunnan University, Kunming 650091, P. R. China.*

---

\* Corresponding author: [dongchjun@hotmail.com](mailto:dongchjun@hotmail.com) (CJ Dong), [htguan06@ynu.edu.cn](mailto:htguan06@ynu.edu.cn) (HT Guan)

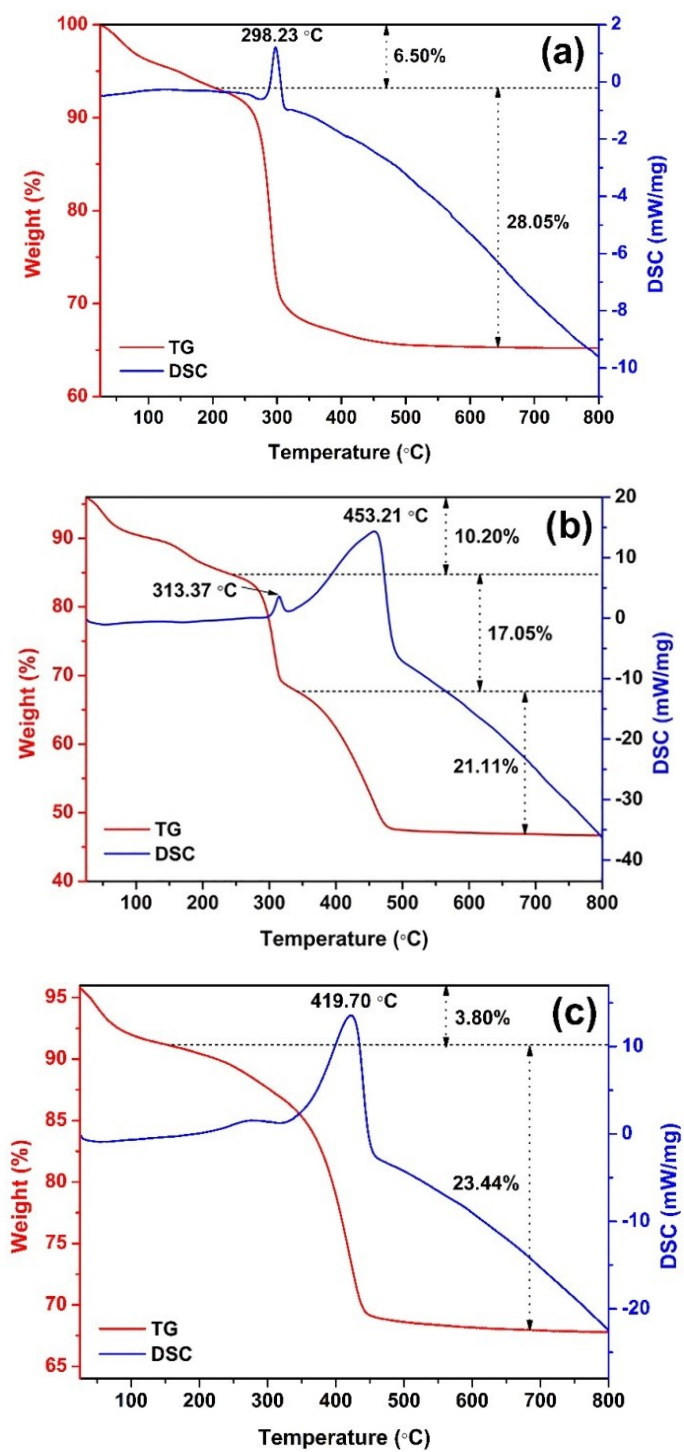

Fig. S1. TG-DSC curves of pure  $\text{Ni(OH)}_2$  (a),  $\text{Ni(OH)}_2/\text{BPC}$  (b) and  $\text{NiO/BPC}$  (c) composites at a heating rate of 5  $^{\circ}\text{C}/\text{min}$  from room temperature to 800  $^{\circ}\text{C}$  in air.

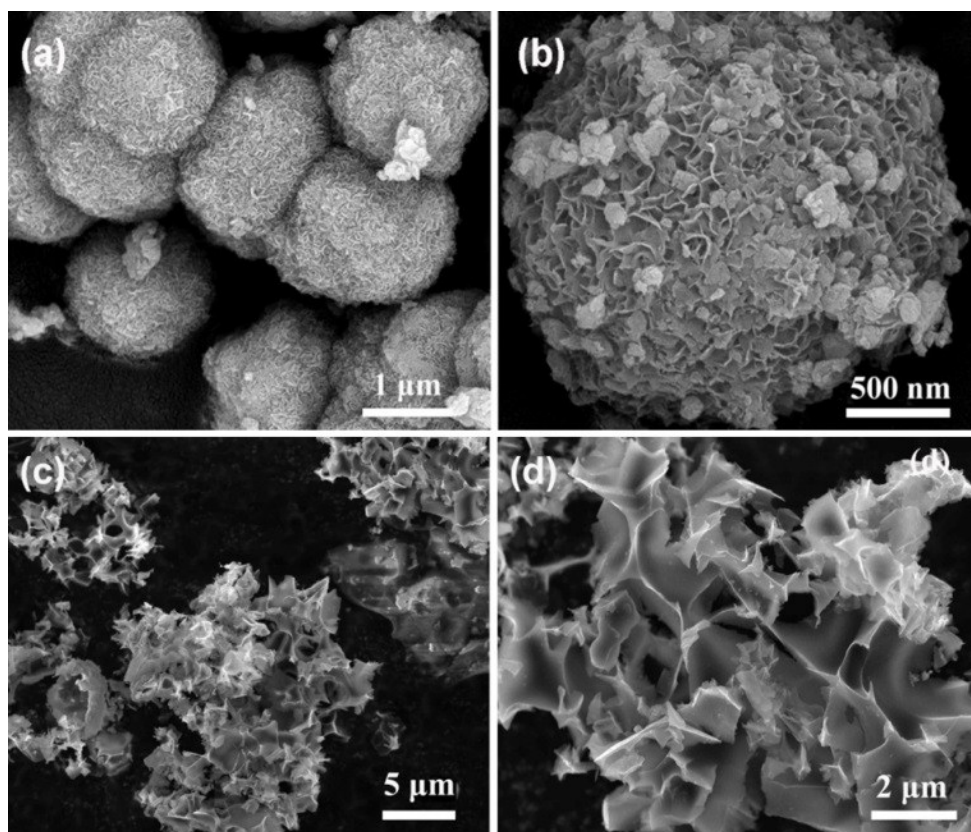

Fig. S2. SEM images of pure  $\text{Ni}(\text{OH})_2$  nanostructures (a, b) and biomass activated carbon (c, d).

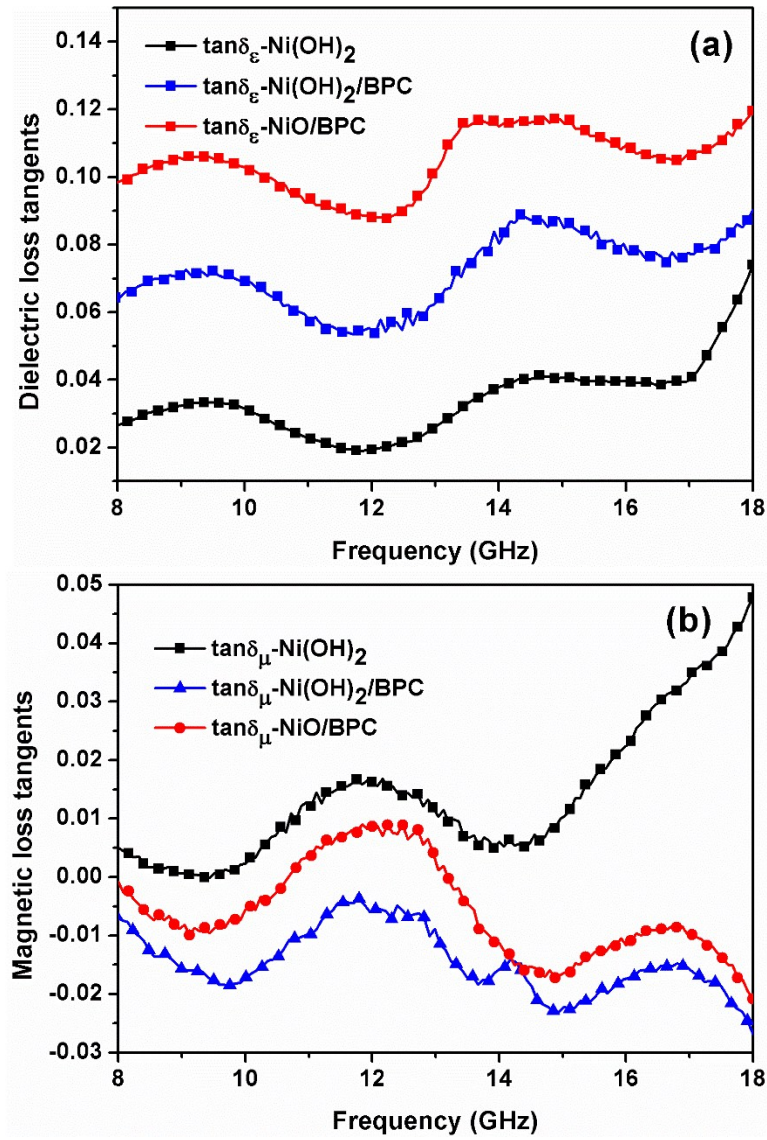

Fig. S3. Dielectric (a) and magnetic (b) dissipation factors of the  $\text{Ni(OH)}_2$ ,  $\text{Ni(OH)}_2/\text{BPC}$  and  $\text{NiO/BPC}$  compositions.

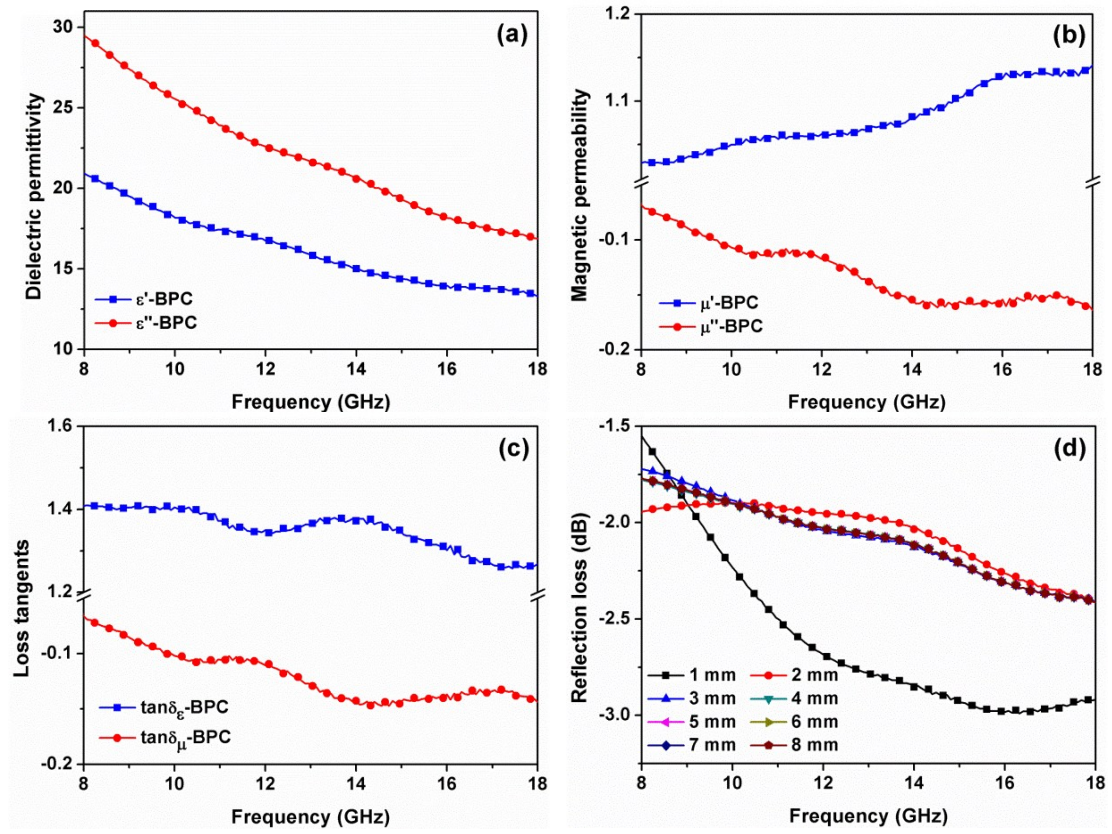

Fig. S4. Dielectric permittivity (a), magnetic permeability (b), dissipation factors (c) and reflection loss (d) of the BPC sample.

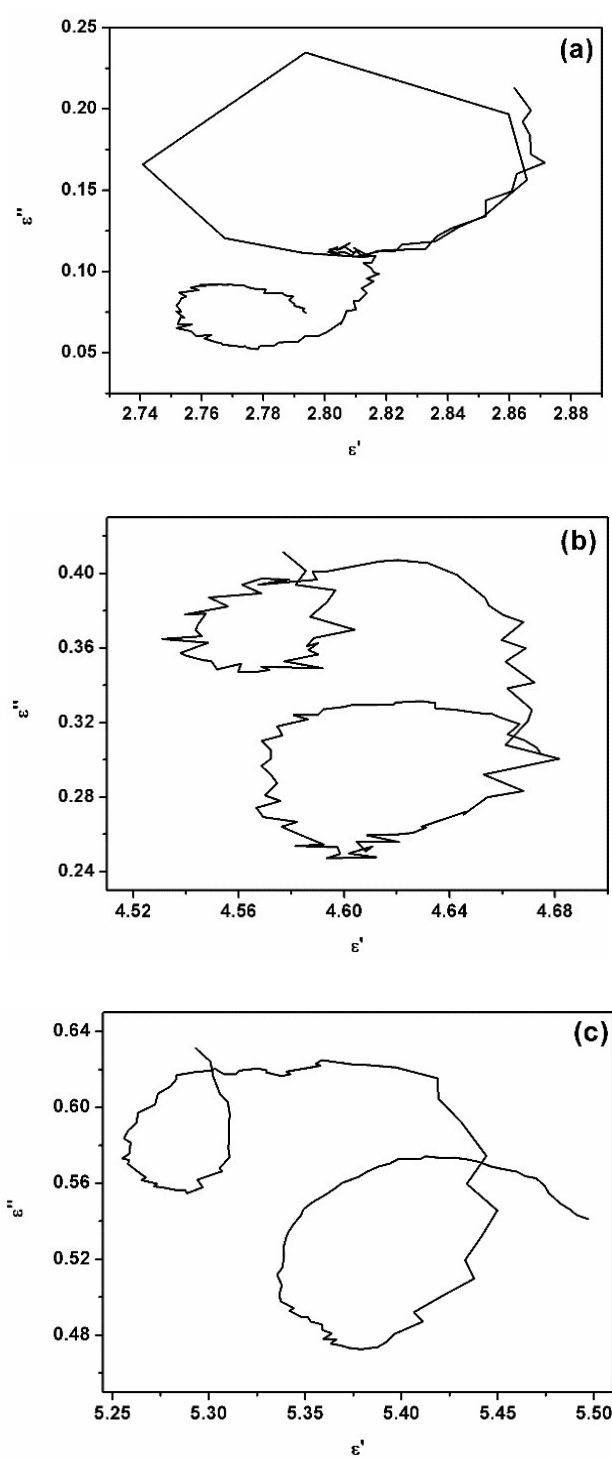

Fig. S5. Cole-cole plots of the  $\text{Ni(OH)}_2$  (a),  $\text{Ni(OH)}_2/\text{BPC}$  (b) and  $\text{NiO/BPC}$  (c) composites.
